# Supplementary material
Source: PubMed Central journal article supplement (PMC2962460)

**Supplemental Table 1: Primers for quantitative PCR.**

| Gene           | Foward                   | Reverse                  | Accession Number |
|----------------|--------------------------|--------------------------|------------------|
| AdipoR1        | CCGTCCGGGCAGTACACT       | ATCTGTGAAGGAGCAGCAG      | NM_028320        |
| AdipoR2        | CACCGGAGCTGCCCTCTA       | AGTCAAACCAGATGTCACA      | NM_197985        |
| APPL1          | TGATGGCTGTGGACTGTGAAGACA | ATGCCCTACGATCCAGTTCAGCAT | NM_145221.2      |
| Pdx-1          | TTTGAAGTCAGTCAGTTGCTCCTT | CCTTCAACCCCTCTCTTGCTATT  | NM_008814        |
| MafA           | AGGAGGTCATCCGACTGAAACAGA | ATTTCTCCTTGTACAGGTCCCGCT | NM_194350        |
| Insulin 1      | TGGCTTCTTCTACACACCCAAGTC | ACTGATCCACAATGCCACGTTCT  | NM_008386        |
| Insulin 2      | GTGGCTTCTTCTACACACCCATGT | GCACTGATCTACAATGCCACGCTT | NM_008387        |
| $\beta$ -actin | CTGAATGGCCCAGGTCTGA      | CCCTGGCTGCCTCAACAC       | NM_007393        |

**Supplemental Table 2: siRNA targeting sequences**

| Gene    | siRNA                                                                                    |
|---------|------------------------------------------------------------------------------------------|
| AdipoR1 | GGACACAUCUGCUUGGUUU<br>GGAAUUCGGUUAUGGCCUA<br>GAGGGACGUUGGAGAGUCA<br>AGGGAUUGCUCUACUGAUU |
| AdipoR2 | GAAUUUCGUUCAUGAUUG<br>CGGAUUGGCUUAAGGAUAA<br>CCAGGAAGAUGAAGGGUUU<br>UGGAAGAGUUUGUUUGUAA  |

**Supplemental Figure S1:** MIN6 cells were stimulated with **A.** 0-10  $\mu\text{g}/\text{mL}$  fAd or **B.** 0-5  $\mu\text{g}/\text{mL}$  gAd for 24 h in serum free media. PBS or 5 mM TrisHCl was used as respective controls (veh). Western blot analysis of phospho-Akt [S473] (60 kDa) or  $\beta$  actin (43 kDa). Representative immunoblots are shown. Quantified values represent means  $\pm$  SE of 3 experiments and are normalized to  $\beta$  actin and response at highest concentration.

**Supplemental Figure S2.** Cells were stimulated with or without 2.5  $\mu\text{g}/\text{mL}$  gAd or 5  $\mu\text{g}/\text{mL}$  fAd for 10 min, 1 h or 24 h in serum free media. PBS or 5 mM TrisHCl was used as respective controls (veh). Western blot analysis of **A.** phospho-AMPK [T172] (62 kDa), **B.** phospho-p38 [T180/Y182] (43 kDa) and  $\beta$  actin (43 kDa). Representative immunoblots are shown. Quantified values represent means  $\pm$  SE of 3 experiments and are normalized to  $\beta$  actin and control.

**Supplemental Figure S3.** Cells were stimulated with or without 2.5  $\mu\text{g}/\text{mL}$  gAd, 5  $\mu\text{g}/\text{mL}$  fAd or 100 nM insulin (ins) for 10 min, 1 h or 24 h in serum free media. PBS or 5 mM TrisHCl was used as respective controls (veh). Western blot analysis of phospho-Akt [T308] (60 kDa) (**A-C**), total Akt (60 kDa) (**D**), total ERK1/2 (42, 44 kDa) (**D**) and  $\beta$  actin (43 kDa). Representative immunoblots are shown. Quantified values (both bands were assessed for phospho-ERK) represent means  $\pm$  SE of 3–9 experiments and are normalized to  $\beta$  actin and control. \* $p < 0.05$  vs. respective control, # $p < 0.05$  vs. ins or fAd alone.

**Supplemental Figure S4:** **A.** INS-1 832/13 and **B.** MIN6 cells were stimulated with or without 2.5  $\mu\text{g}/\text{mL}$  gAd or 5  $\mu\text{g}/\text{mL}$  fAd for 48 h in growth media or 30 mM glucose. PBS or 5 mM TrisHCl was used as respective controls (veh). Cell lysates were prepared and subjected to western blot analysis for cleaved caspase-3 (19 kDa) and  $\beta$  actin (43 kDa). Representative immunoblots are shown. Quantified values represent means  $\pm$  SE of 3 experiments and are normalized to  $\beta$  actin and control. \*  $p < 0.05$  compared to veh in 30 mM glucose. **C.** Mouse islets were stimulated with or without 2.5  $\mu\text{g}/\text{mL}$  gAd for 24 h in 2.8 or 25 mM glucose. 5 mM TrisHCl was used as control (veh). Cells were subjected to qPCR for *Ins I* and *Ins II* transcript expression. Quantified values represent means  $\pm$  SE of 4-6 experiments and are normalized to  $\beta$  actin and control. \*  $p < 0.05$  compared to veh

**Supplemental Figure S5.** **A.** Western blot analysis of Akt (60 kDa) and  $\beta$  actin (43 kDa) in MIN6 cells transfected with DN-Akt. Representative immunoblot shown. **B.** Western blot analysis of AdipoR1 or 2 (46 kDa) and  $\beta$  actin (43 kDa) in cells co-transfected with siRNA against AdipoR1 and 2 or control siRNA (ConSi). Representative immunoblots are shown. Quantified values represent means  $\pm$  SE of 4 experiments and are normalized to  $\beta$  actin and ConSi. \*\*\* $p < 0.001$  vs. ConSi. **C.** Western blot analysis of phospho-Akt [T308] (60 kDa) and  $\beta$  actin (43 kDa) in cells co-transfected with siRNA against AdipoR1 and 2 or ConSi and stimulated with 2.5  $\mu\text{g}/\text{mL}$  gAd or 5  $\mu\text{g}/\text{mL}$  fAd for 24 h in serum free media. Representative immunoblots are shown. Quantified values represent means  $\pm$  SE of 4 experiments and are normalized to  $\beta$  actin and control. \* $p < 0.05$  vs. respective control.

**Supplemental Figure S6.** Cells were infected with gfp, AdipoR1 or 2 adenoviruses. 24 h post-infection, **A.** cell lysates were subjected to cell fractionation or **B., C.** cells were stimulated with or without 2.5  $\mu\text{g}/\text{mL}$  of gAd, 5  $\mu\text{g}/\text{mL}$  fAd or 100 nM insulin (ins) for 10 min. Western blot analysis of AdipoRs (46 kDa), phospho-Akt [S473]/[T308] (60 kDa),  $\beta$  actin (43 kDa) and Tim23 (23 kDa) [membrane marker]. Representative immunoblots are shown. Quantified values represent means  $\pm$  SE of 4-6 experiments and are normalized to  $\beta$  actin. C: cytosolic, M: membrane fraction.

## Supplemental Figure S1.

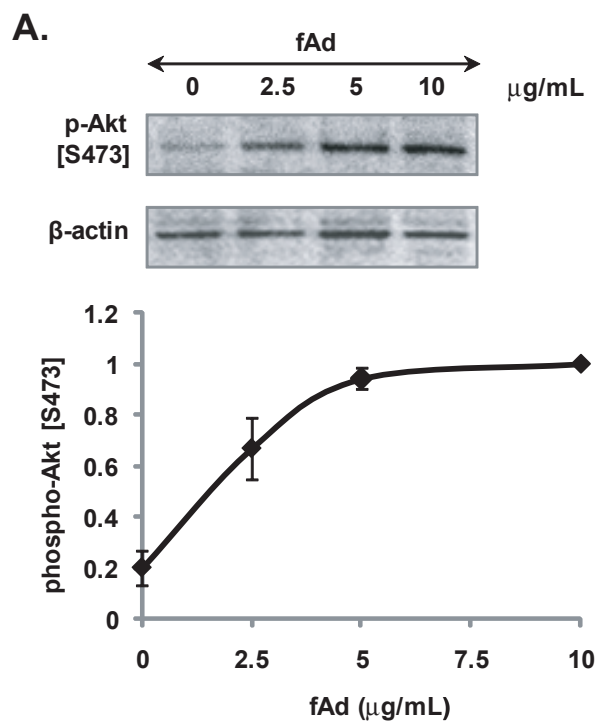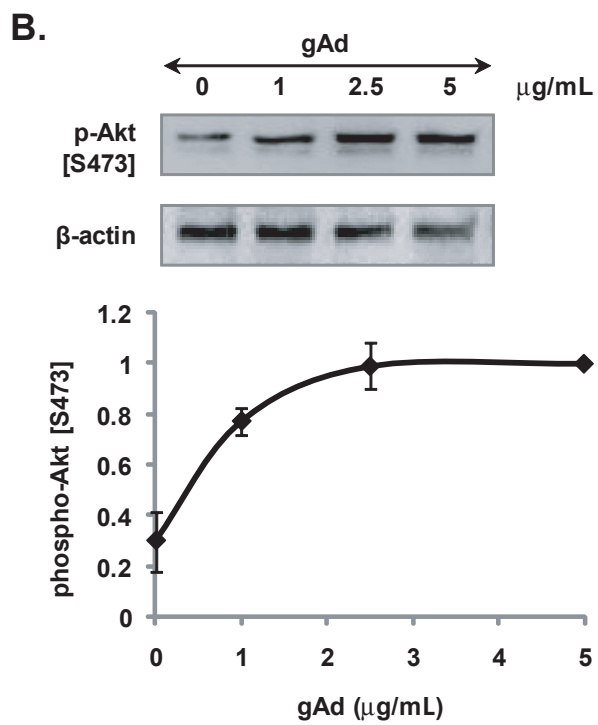

**Supplemental Figure S2.**

**A. C2C12 myocytes**

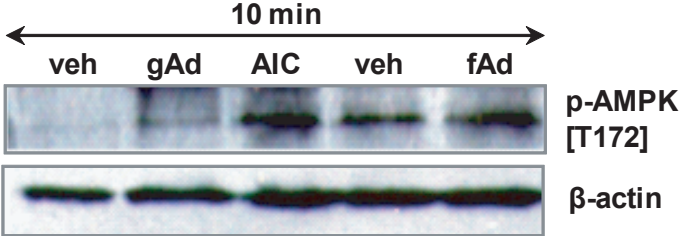

**B. MIN6 beta cells**

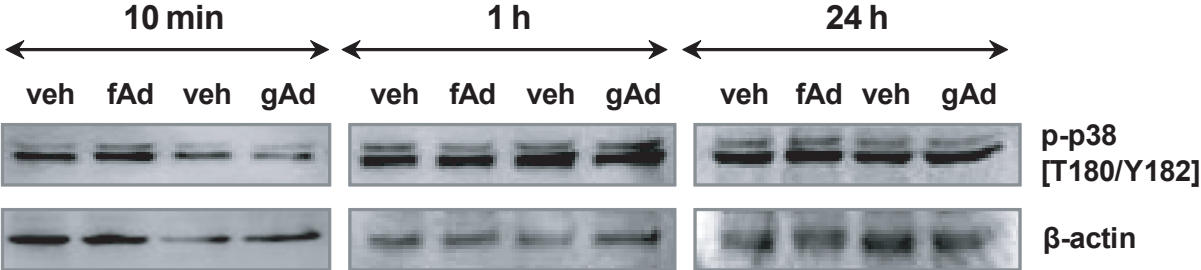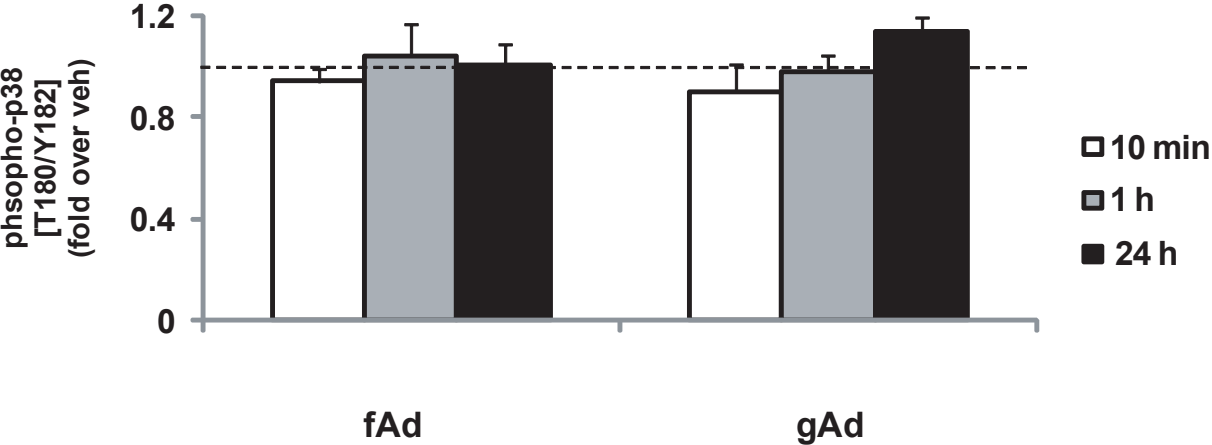

# Supplemental Figure S3.

## A. MIN6 beta cells

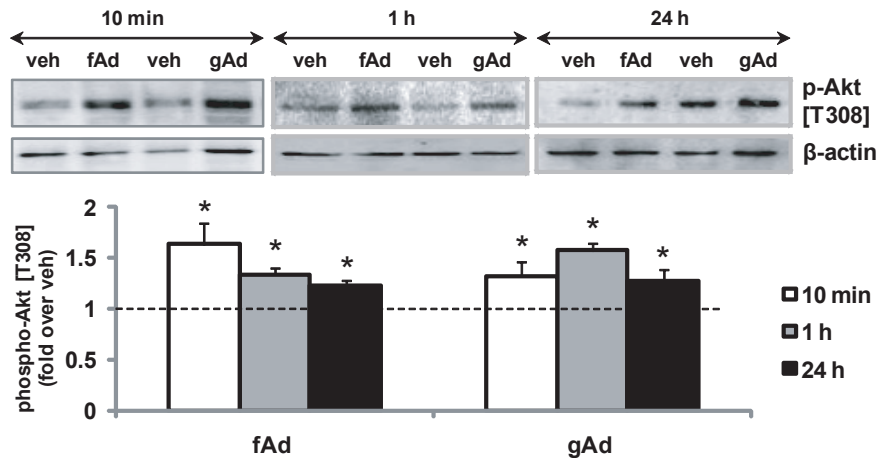

## B. mouse islets

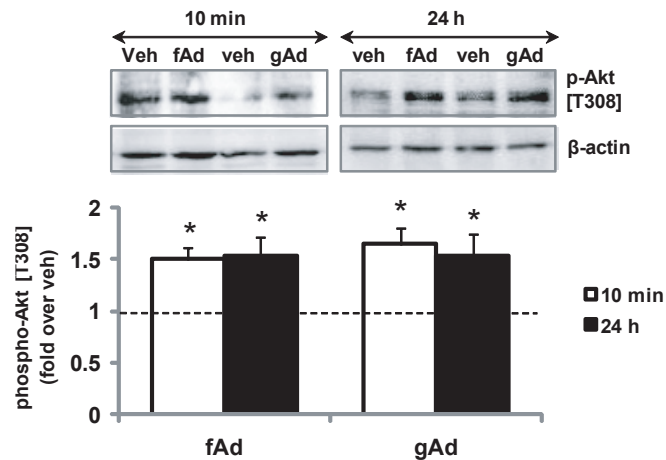

## C. MIN6 beta cells

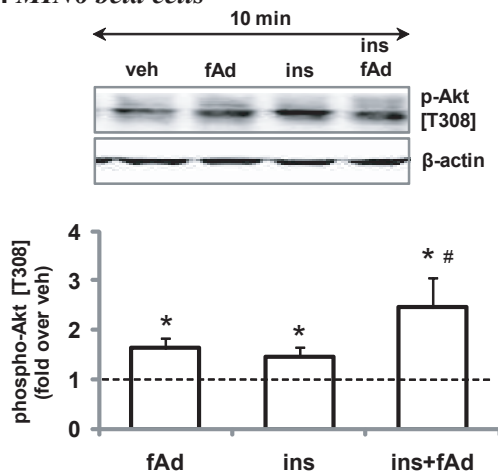

## D. MIN6 beta cells

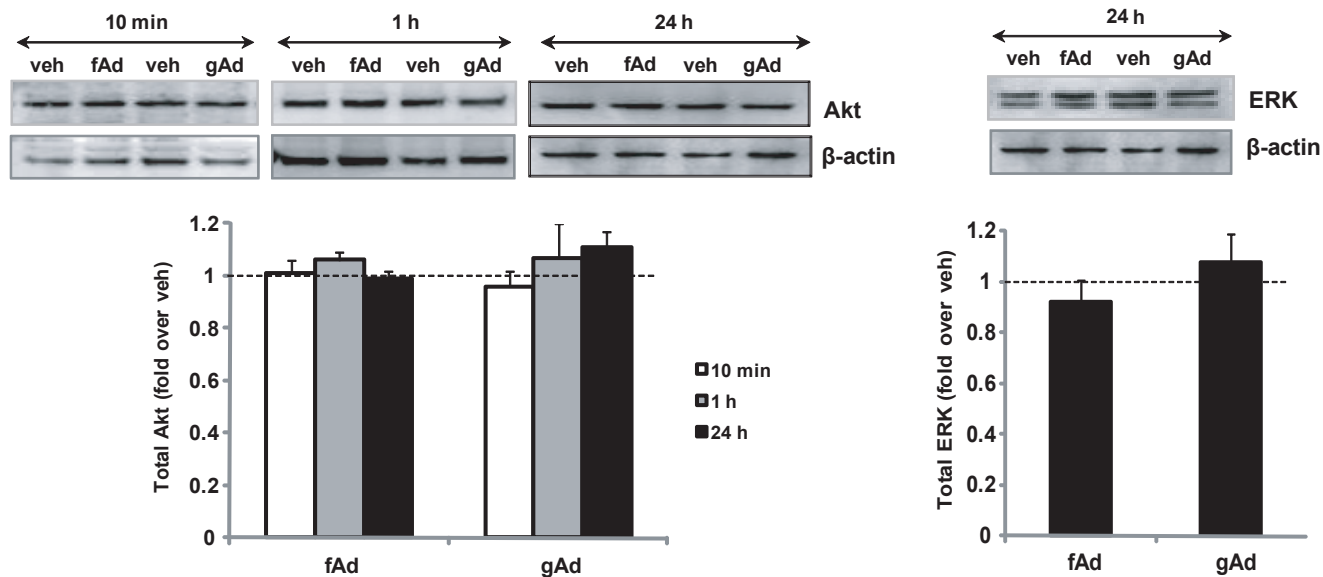

# Supplemental Figure S4.

**A.**

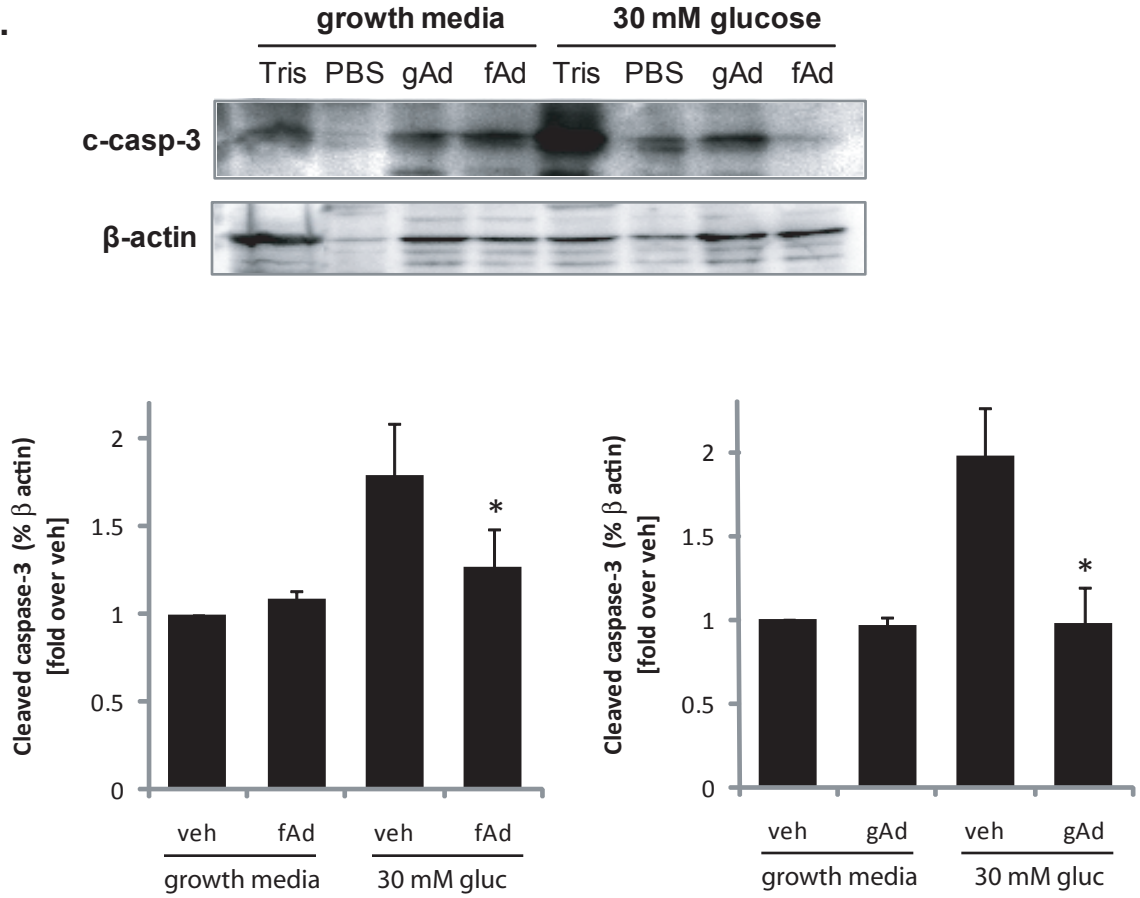

**B.**

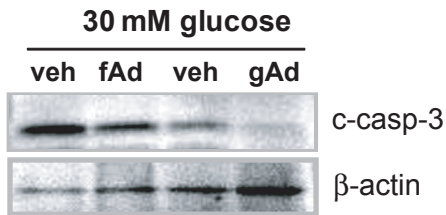

**C.**

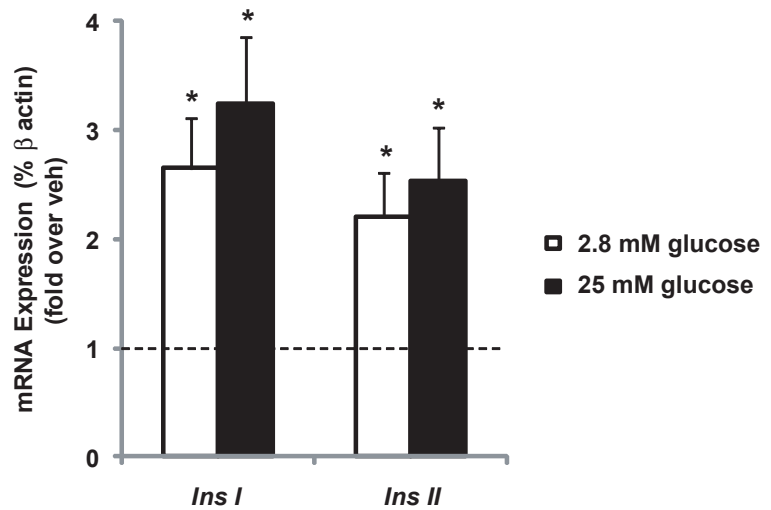

# Supplemental Figure S5.

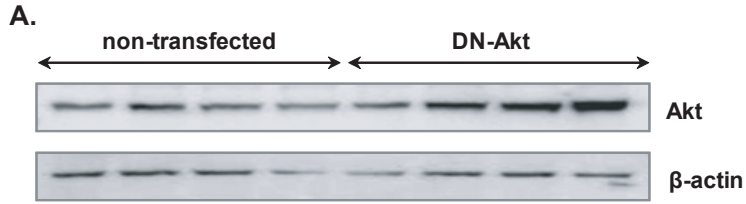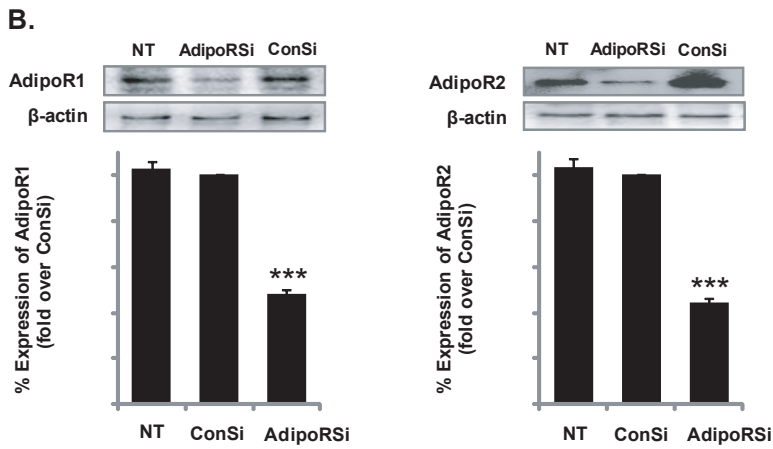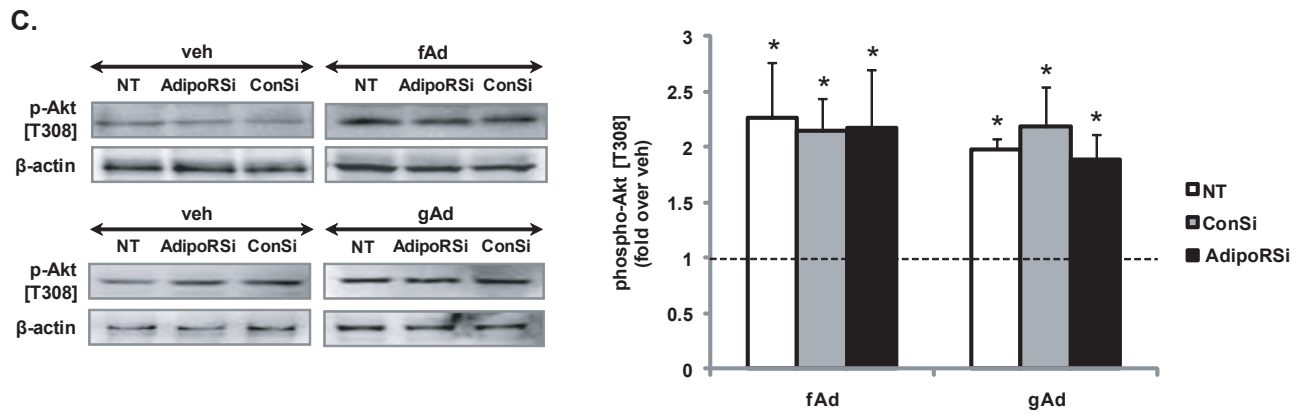

## Supplemental Figure S6.

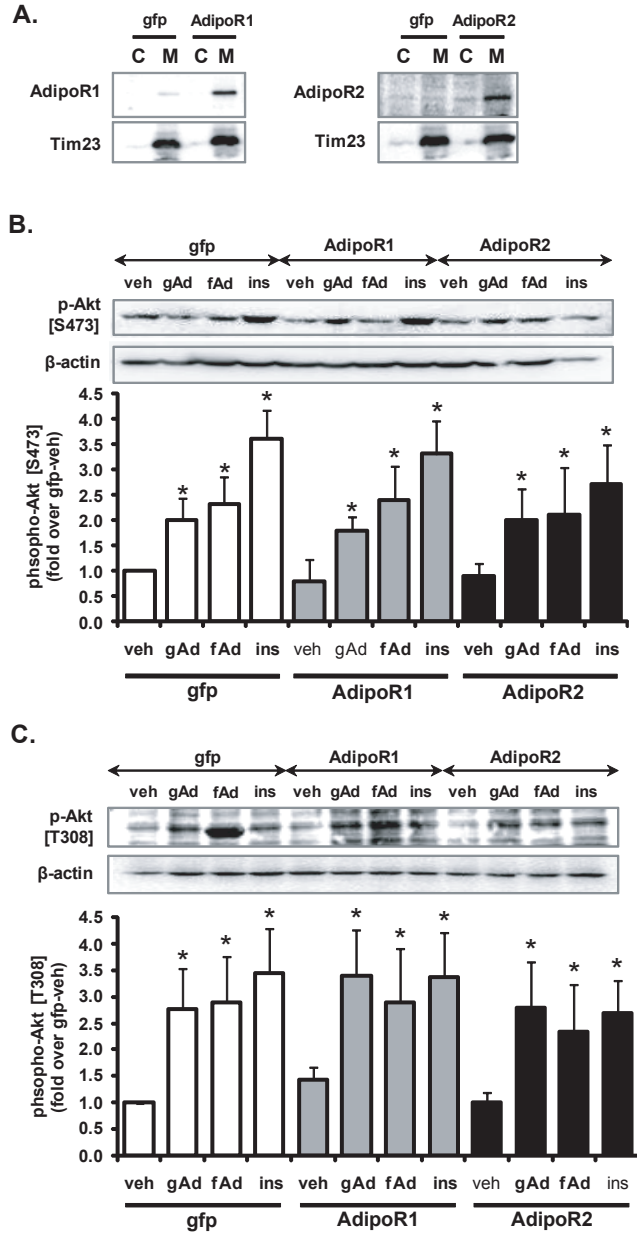

Supplement: supp_M109.085084_Wijesekara.pdf [file supp_M109.085084_Wijesekara.pdf]
